# Supplementary material for: Mental Health, Sense of Coherence, and Interpersonal Violence during the COVID-19 Pandemic Lockdown in Germany
Source: MDPI journal article supplement (doi:10.3390/jcm9113708), 2020-11-18

## Supplementary Materials

**Table S1.** Mann-Whitney-U-tests for group differences between participants with and without pre-existing physical health conditions.

| Variable   | z-Value | p-Value | r-Value | Mean Rank <sub>WPHC<sup>a</sup></sub> | Mean Rank <sub>WOPHC<sup>b</sup></sub> |
|------------|---------|---------|---------|---------------------------------------|----------------------------------------|
| PHQ-4      | -6.69   | 0.000   | 0.11    | 1903.16                               | 1667.42                                |
| WHO-5      | -7.58   | 0.000   | 0.13    | 1919.06                               | 1651.04                                |
| SOC-L9     | -5.89   | 0.000   | 0.10    | 1457.43                               | 1656.52                                |
| Coping     | -2.36   | 0.018   | 0.04    | 1813.88                               | 1734.92                                |
| PHQ stress | -2.75   | 0.006   | 0.05    | 1690.17                               | 1596.60                                |

Notes. <sup>a</sup> = with physical health condition,  $n = 1300$  <sup>b</sup> = without physical health condition,  $n = 2230$ .

**Table S2.** Means and standard deviations for PHQ-4, WHO-5, SOC-L9 and PHQ stress module for participants with and without pre-existing physical health conditions.

| Variable   | $M_{WPHC^a}$ | $SD_{WPHC^a}$ | $M_{WOPHC^b}$ | $SD_{WOPHC^b}$ |
|------------|--------------|---------------|---------------|----------------|
| PHQ-4      | 4.26         | 3.20          | 3.52          | 2.90           |
| PHQ Stress | 6.61         | 3.92          | 6.23          | 3.87           |
| WHO-5      | 13.70        | 5.97          | 12.10         | 5.84           |
| SOC-L9     | 40.68        | 10.31         | 42.95         | 9.83           |

Notes. <sup>a</sup> = with physical health condition,  $n = 1300$  <sup>b</sup> = without physical health condition,  $n = 2230$ .

**Table S3.** Answers for item “coping” (percentage) for participants with and without pre-existing physical health conditions.

| How Well Are You Coping? | Percentage % <sub>WPHC<sup>a</sup></sub> | Percentage % <sub>WOPHC<sup>b</sup></sub> |
|--------------------------|------------------------------------------|-------------------------------------------|
| Very good                | 14.1                                     | 14.3                                      |
| Good                     | 43.5                                     | 47.3                                      |
| Neither nor              | 12.8                                     | 13.0                                      |
| Not very good            | 23.8                                     | 21.4                                      |
| Not good at all          | 5.8                                      | 3.9                                       |

Notes. <sup>a</sup> = with physical health condition,  $n = 1300$  <sup>b</sup> = without physical health condition,  $n = 2230$ .

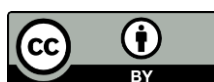

Supplement: s1 [file s1]
